# Supplementary material
Source: Royal Society of Chemistry journal article supplement (doi:10.1039/d6gc02101h)
Supplement: d6gc02101h1.pdf [file d6gc02101h1.pdf]

## Supplementary Information

# Precursor-Regulated Reconstruction of Cu-based Catalysts for Efficient Electrocatalytic Urea Synthesis from CO<sub>2</sub> and Nitrate

*Ke Wu<sup>a</sup>, Guojie Ye<sup>a</sup>, Zhengwei Zhou<sup>a</sup>, Zuofeng Chen<sup>b</sup>, Zhendong Lei<sup>a</sup> and Deli Wu<sup>a\*</sup>.*

<sup>a</sup> State Key Laboratory of Water Pollution Control and Green Resource Recycling, College of Environmental Science & Engineering, Key Laboratory of Water Supply, Water Saving and Ecological Governance in the Yangtze River Delta, Ministry of Water Resources, Shanghai Institute of Pollution Control and Ecological Security, Tongji University, Shanghai 200092, China.

<sup>b</sup> Shanghai Key Laboratory of Chemical Assessment and Sustainability, School of Chemical Science and Engineering, Tongji University, Shanghai 200092, China.

\* Corresponding author:

Deli Wu

Email: wudeli@tongji.edu.cn

ORCID ID: <https://orcid.org/0000-0002-8565-0779>

**Chemicals.** Hydrophobic carbon paper (SCL-28BC) was obtained from Suzhou Sinero Technology Co., Ltd., ultrasonic washing with acetone and deionized water before use. Acetone (AR) and  $\text{KNO}_3$  (GR) were purchased from Sinopharm Chemical Reagent Co., Ltd.  $\text{KHCO}_3$  (AR,  $\geq 99.5\%$ ), Isopropyl alcohol ( $\text{C}_3\text{H}_8\text{O}$ , AR,  $\geq 99.5\%$ ), Nafion perfluorinated resin solution (5wt%), N-(1-naphthyl) ethylenediamine dihydrochloride (98%), Sulfanilic acid (AR, 99.5%),  $\text{NaClO}$  (6-14% active chlorine basis),  $\text{Na}_2\text{CO}_3$  (AR,  $\geq 99.5\%$ ),  $\text{NaOH}$  (95%, granular), salicylic acid ( $\text{C}_7\text{H}_6\text{O}_3$ , AR, 99.5%), Sodium citrate dihydrate ( $\text{C}_6\text{H}_5\text{Na}_3\text{O}_7 \cdot 2\text{H}_2\text{O}$ , 99.0%) and urea (99%, biotechnology grade) were bought from Shanghai Macklin Biochemical Technology Co., Ltd.  $\text{Cu}(\text{NO}_3)_2 \cdot 3\text{H}_2\text{O}$  (99%), sodium nitroferricyanide dihydrate (AR, 99.0%)  $\text{KNO}_2$  (AR, 97%) were purchased from Shanghai Aladdin Biochemical Technology Co., Ltd. High-pure  $\text{CO}_2$  ( $>99.999\%$ ) and Ar ( $>99.999\%$ ) were purchased from Shanghai Weichuang Standard Gas Analysis Technology Co., Ltd. Urease (urease activity :20KU, refined grade), produced by Shanghai Yuanye Biotechnology Co., Ltd. All chemicals were used without further purification. Deionized water (DIW) was used in all the experimental processes.

**Computational Methods.** The first-principle-based geometry optimization calculations were carried out within density-functional theory (DFT), implemented in the Vienna Ab Initio Simulation Package (VASP) code,<sup>1</sup> using the frozen-core projector augmented-wave (PAW) method to describe the interaction between the atomic cores and the valence electron density.<sup>2</sup> The exchange-correlation potential was approximated within the generalized gradient approximation (GGA) using the Perdew-Burke Ernzerhof (PBE) functional.<sup>3</sup> The dispersion corrected DFT-D3 schemes was employed to describe the Van der Waals (vdW) interactions.<sup>4</sup> Plane-wave cutoff energy was set to 500 eV. The conjugate gradient algorithm was used in ionic optimization, convergence threshold was set to  $10^{-5}$  eV atom<sup>-1</sup> in electronic relaxation and 0.02 eV Å<sup>-1</sup> in Hellmann-Feynman force on each atom. The structure was optimized using the Monkhorst-Pack scheme for k-point sampling of the first Brillouin zone on a  $2 \times 2 \times 1$  grid.<sup>5</sup>

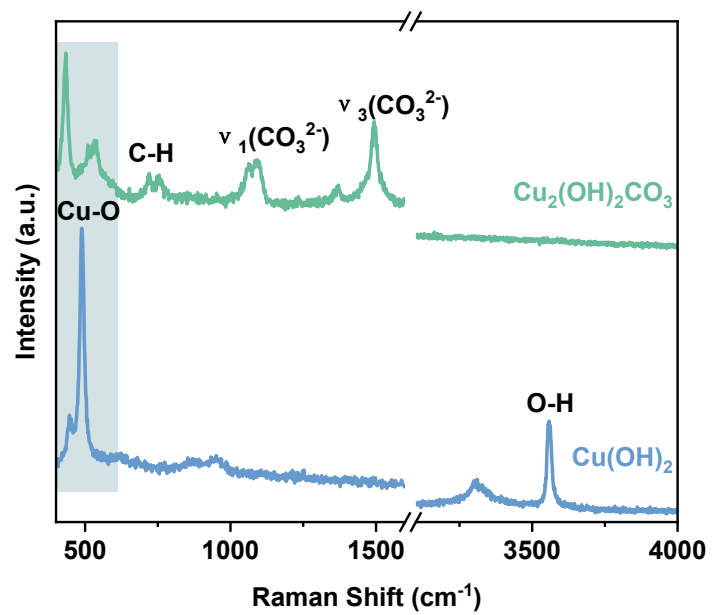

Supplementary Figure 1. FTIR spectrum of  $\text{Cu}_2(\text{OH})_2\text{CO}_3$  and  $\text{Cu}(\text{OH})_2$ .

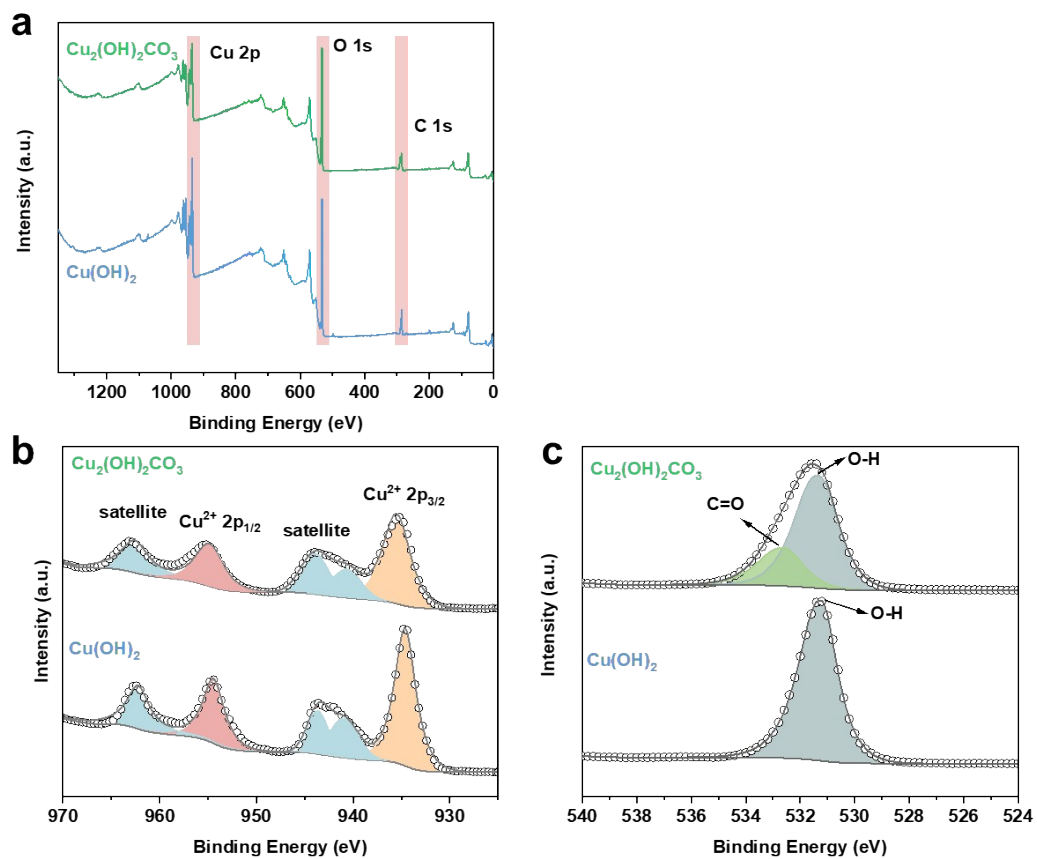

**Supplementary Figure 2.** a, Survey, b, Cu 2p, and c, O 1s XPS spectrum of  $\text{Cu}_2(\text{OH})_2\text{CO}_3$  and  $\text{Cu}(\text{OH})_2$ .

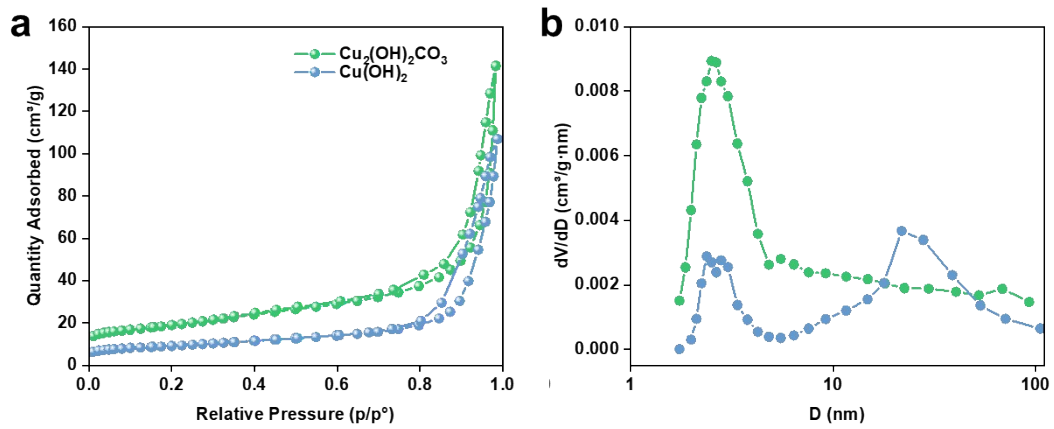

**Supplementary Figure 3.** **a**,  $\text{N}_2$  adsorption and desorption curves, and **b**, pore size distributions of  $\text{Cu}_2(\text{OH})_2\text{CO}_3$  and  $\text{Cu}(\text{OH})_2$ .

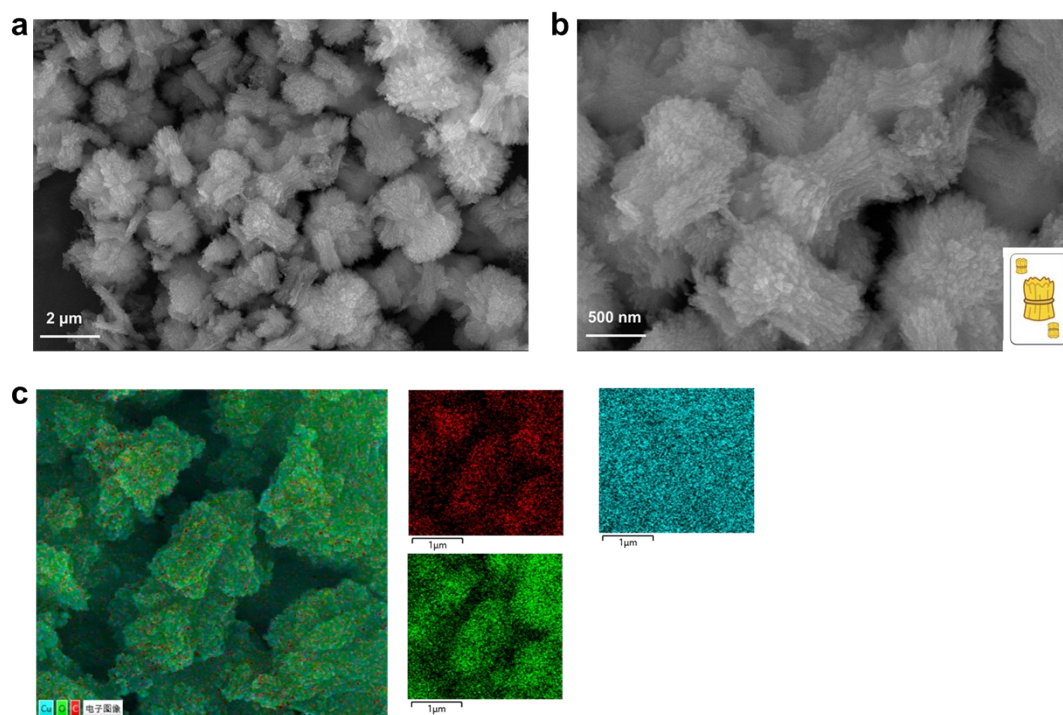

**Supplementary Figure 4.** SEM images of  $\text{Cu}_2(\text{OH})_2\text{CO}_3$ . **a**, 2  $\mu\text{m}$ , **b**, 500 nm, and **c**, corresponding EDS mapping.

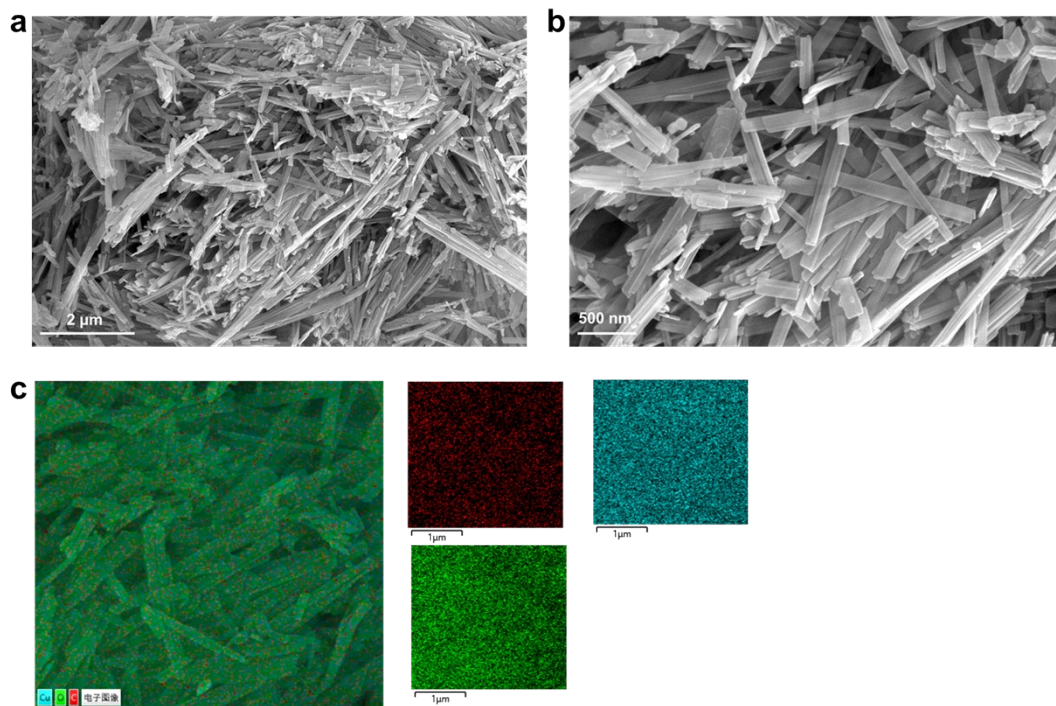

**Supplementary Figure 5.** SEM images of Cu(OH)<sub>2</sub>. **a**, 2 μm, **b**, 500 nm, and **c**, corresponding EDS mapping.

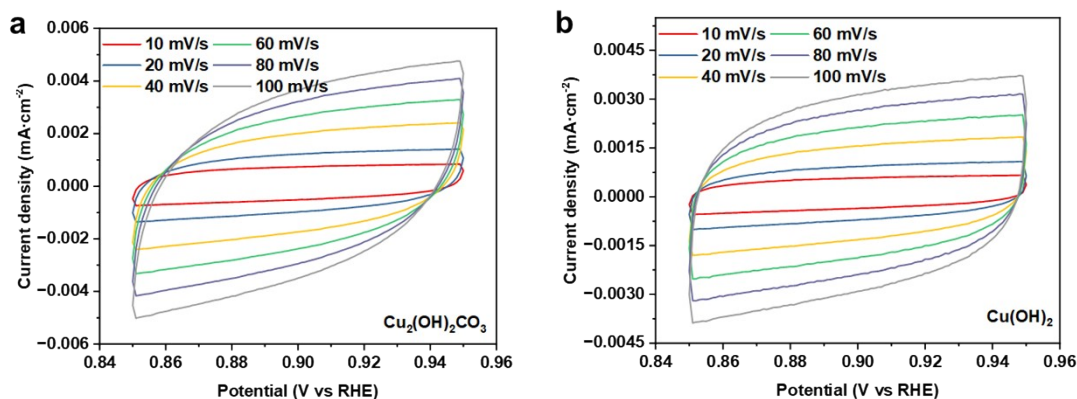

**Supplementary Figure 6.** The electrochemical active surface area measurements on electrocatalysts. Cyclic voltammogram curves of **a**, Cu<sub>2</sub>(OH)<sub>2</sub>CO<sub>3</sub>, **b**, Cu(OH)<sub>2</sub>.

Because electrocatalysis is in essence a surface reaction, where the adsorption/desorption of reactants/products takes place only at or near the catalyst surface region, the intrinsic electrocatalytic activity is most frequently defined as the specific activity which is the current divided by the surface area of the catalyst (e.g., mA cm<sub>catalyst</sub><sup>-2</sup>).<sup>6, 7</sup> The potential window of CVs was 0.85 V to 0.95 V (vs. RHE, **Supplementary Figure 6**) in a non-Faradic potential range under different scan rates with 10, 20, 40, 60, 80 and 100 mV s<sup>-1</sup>. The double layer capacitances ( $C_{dl}$ ) of samples were estimated by plotting the  $\Delta J = J_a - J_c$  at 0.90 V (vs. RHE) against the scan rate. The linear slope is equivalent to twice of the double-layer capacitance  $C_{dl}$ , and the electrochemical active surface area (ECSA) of catalyst was calculated by the following equation:  $ECSA = C_{dl} / C_s$ . Where  $C_s$  is the specific capacitance of planar surface with an atomically smooth under identical electrolyte conditions, 40  $\mu\text{F cm}^{-2}$  is used in this work.

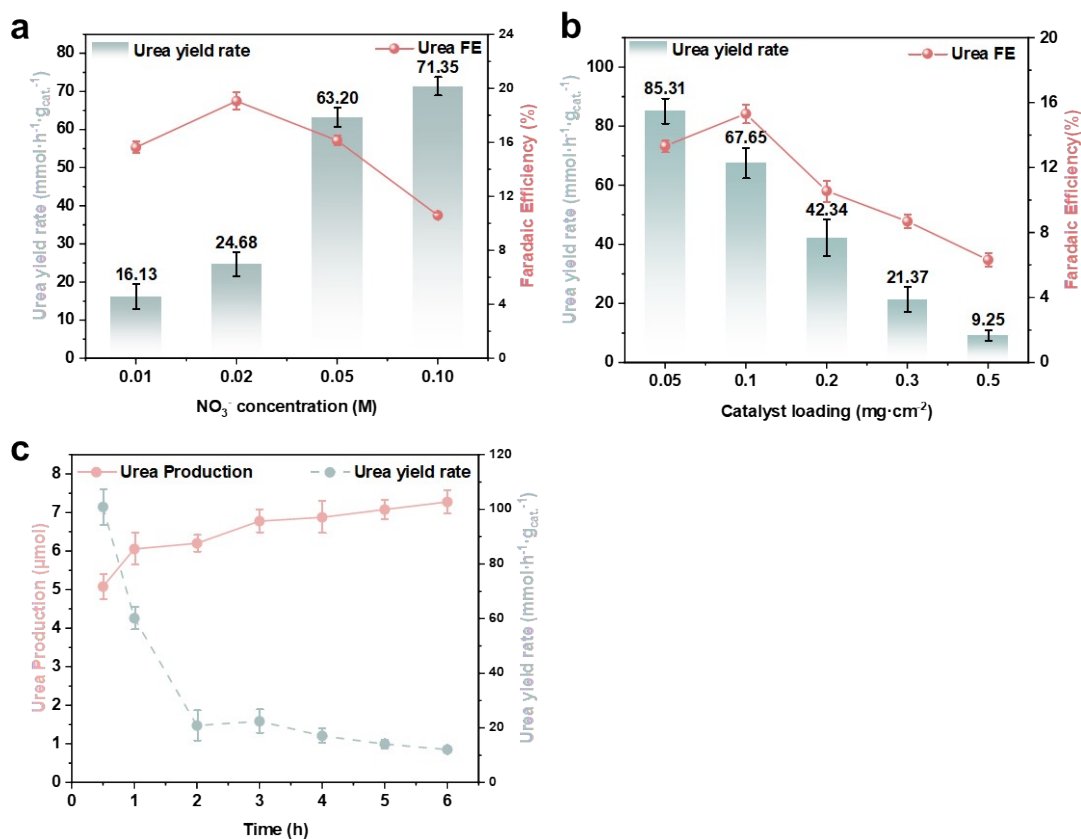

**Supplementary Figure 7.** Exploration of influencing factors. Urea yield rate and Faradaic Efficiency with different **a**, NO<sub>3</sub><sup>-</sup> concentration, **b**, Catalyst loading, and **c**, Variation of Urea Production and Urea yield rate with electrolysis time.

The urea yield rates by coupling different concentrations of nitrate with CO<sub>2</sub> were depicted in **Supplementary Figure 7a**. The urea yield rates gradually increase with the nitrate concentration increased from 10 mM to 50 mM. Subsequently, the nitrate concentration continued to increase to 100 mM, the urea yield rate decreases to 3711.42 mg h<sup>-1</sup> g<sub>catalyst</sub><sup>-1</sup>. The increase of active nitrate coverage on the surface of Cu<sub>2</sub>(OH)<sub>2</sub>CO<sub>3</sub> catalysts promotes C–N coupling, but excessive nitrate coverage leads to the formation of by-products, which occupies too many active sites, and was not conducive to urea production. Therefore, CO<sub>2</sub> saturated-0.1 M KHCO<sub>3</sub> containing 0.05 M KNO<sub>3</sub> was

chosen as electrolyte in the subsequent experiments.

The effect of different catalyst loads on urea yield and selectivity were also investigated. As can be seen from **Supplementary Figure 7b**, with the increase of catalyst loading from 0.05 to 0.5 mg cm<sup>-2</sup>, urea yield continues to decline. While urea selectivity first increases and then decreases, reaching the maximum at 0.1 mg cm<sup>-2</sup>. Therefore, 0.1mg cm<sup>-2</sup> was selected as the best catalyst loading capacity.

According to **Supplementary Figure 7c**, the generation of urea grew progressively during the electrolysis process and reached a maximum after ~3 h without increasing. The urea yield decreased gradually with the increase of electrolysis time. After comprehensive consideration, 1h electrolysis time was selected as the best.

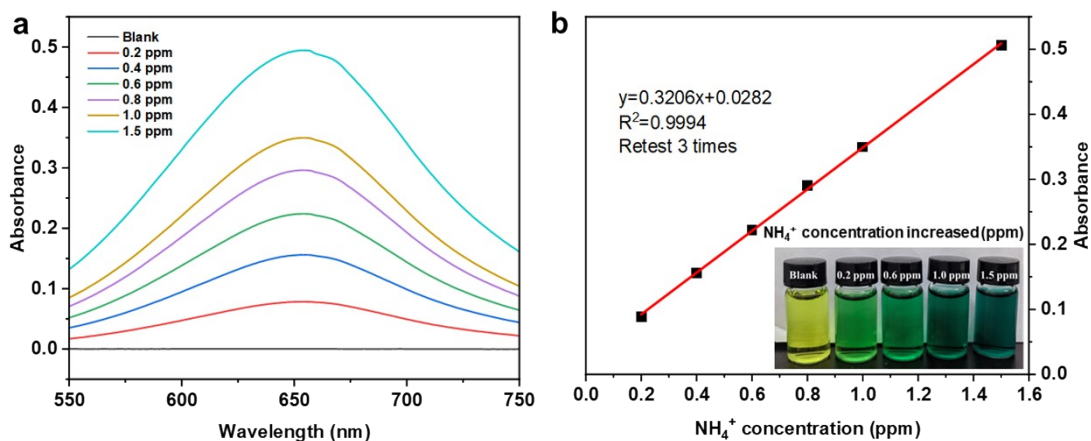

**Supplementary Figure 8.** Indophenol blue for  $\text{NH}_4^+$  quantification. **a**, UV-vis absorption spectra of various  $\text{NH}_4^+$  concentrations, and **b**, Calibration curve used for quantifying  $\text{NH}_4^+$ .

Various concentrations of  $\text{NH}_4^+$  solutions were prepared by dissolving different quantities of  $\text{NH}_4\text{Cl}$  in mixed solutions of 0.1 M  $\text{KHCO}_3$  and 0.05 M  $\text{KNO}_3$ . The concentration of  $\text{NH}_4^+$  exhibits a linear relationship with absorbance, thus the concentration of the products could be calculated via the equation of the calibration curves.

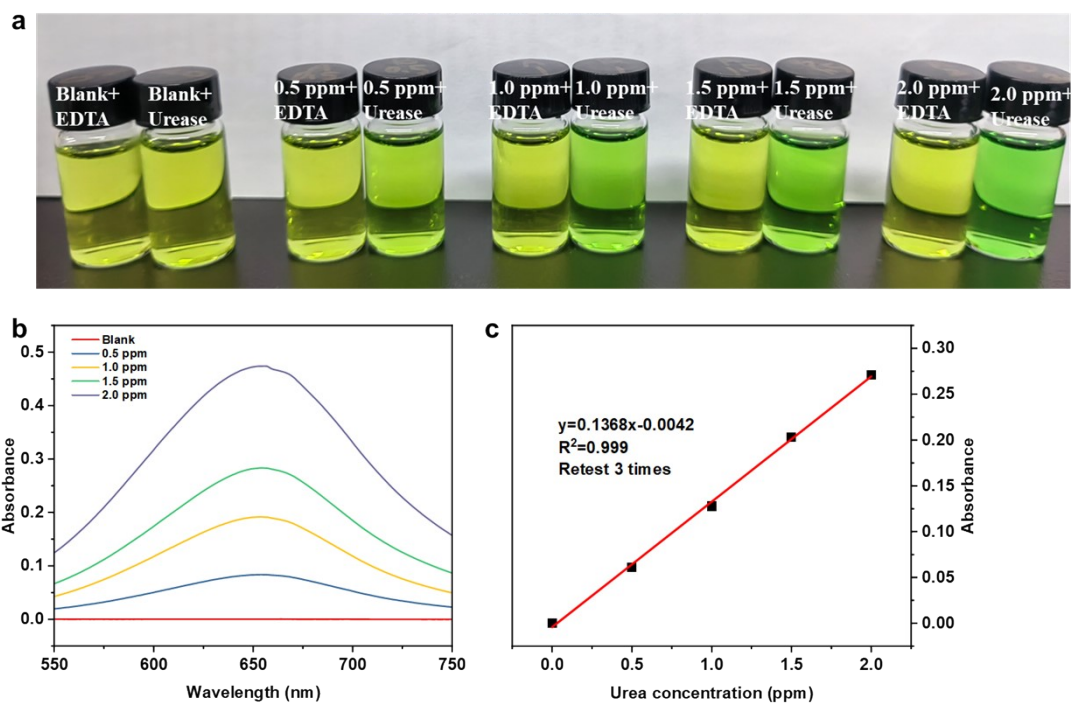

**Supplementary Figure 9.** Indophenol blue for urease decomposition method for urea quantification. **a**, Color of different concentration of urea quantified by urease decomposition method based on indophenol blue method, **b**, UV-vis absorption spectra of various urea concentrations, and **c**, Calibration curve used for quantifying urea.

Urea standards in **Supplementary Figure 9a** were prepared by dissolving different qualities of urea in mixed solutions of 0.1 M  $\text{KHCO}_3$  and 0.05 M  $\text{KNO}_3$ .

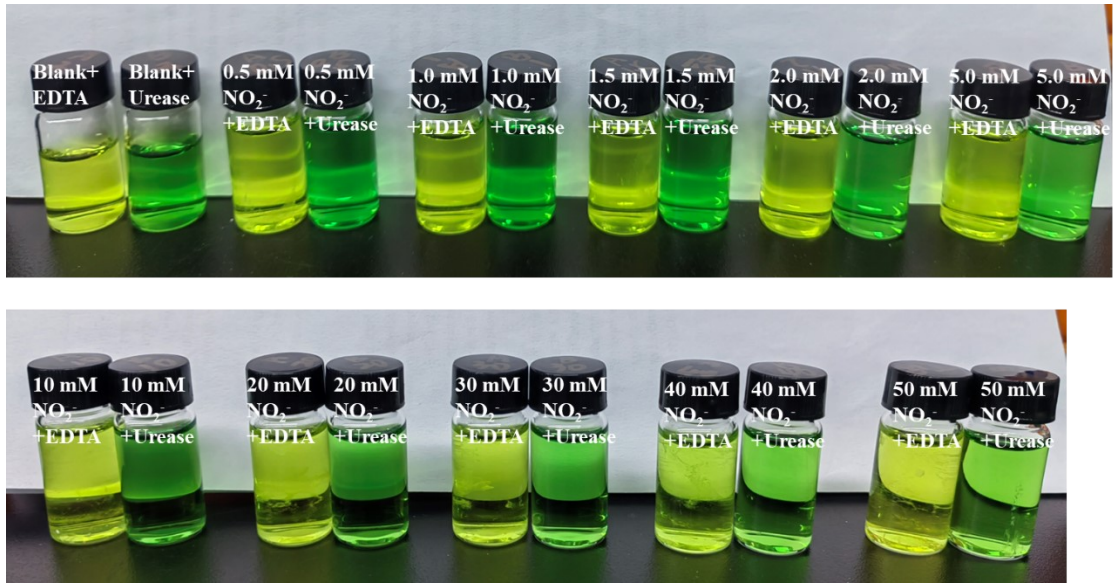

**Supplementary Figure 10.** Urease decomposition method for urea quantification. Color of 2.0 ppm urea with different concentration of  $\text{NO}_2^-$  quantified by urease decomposition method.

Different concentrations of  $\text{NO}_2^-$  solutions with 2.0 ppm urea were prepared and quantitatively analyzed by urease decomposition method. The samples without urease are all yellow after indophenol blue method coloration, indicates that there is no ammonia contamination in standard solutions (**Supplementary Figure 10**). Urease decomposes urea to produce ammonia, so the samples with urease added are all green, and different concentration of  $\text{NO}_2^-$  has no effect on color development. Therefore, urea quantification by urease decomposition method is not affected by coexistence of  $\text{NO}_2^-$ .

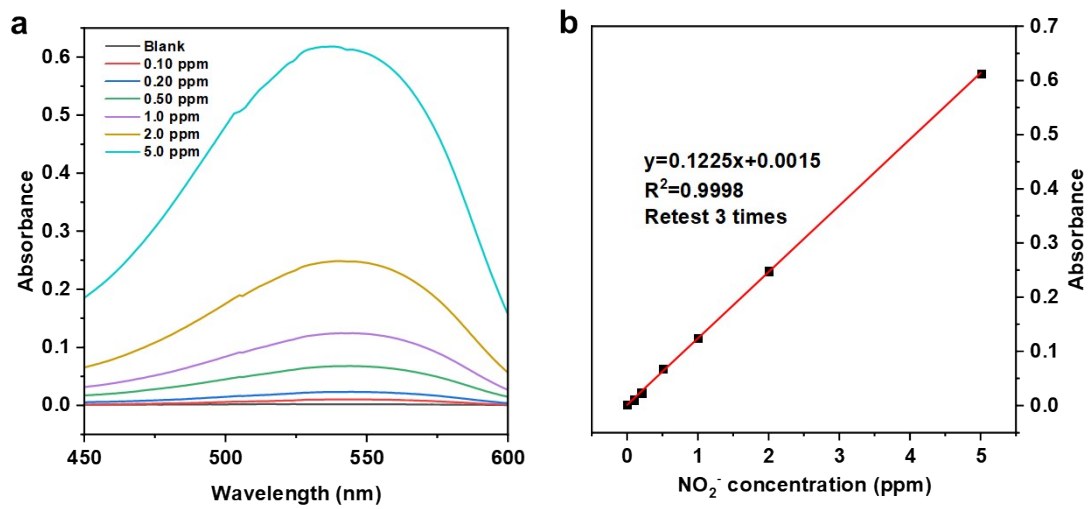

**Supplementary Figure 11.** Absolute calibration of the  $\text{NO}_2^-$ -N detection method using  $\text{KNO}_2$  solutions (0.1 M  $\text{KHCO}_3$ +0.05 M  $\text{KNO}_3$ ) of known concentration as standards.

**a**, UV-Vis absorption spectra of various  $\text{NO}_2^-$  concentrations, and **b**, calibration curve used for estimating  $\text{NO}_2^-$ .

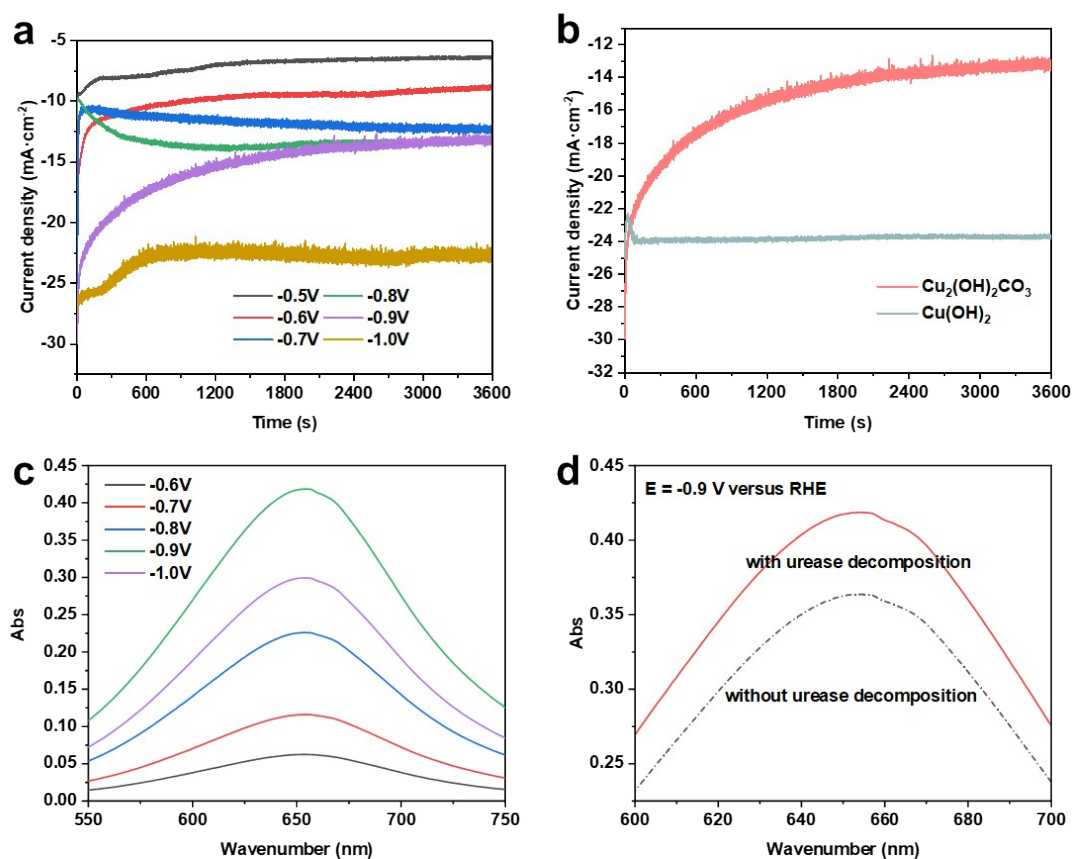

**Supplementary Figure 12.** **a**, I-t curves for electrocatalytic urea synthesis at various applied potential on Cu<sub>2</sub>(OH)<sub>2</sub>CO<sub>3</sub>, **b**, I-t curves for electrocatalytic urea synthesis at E=-0.9V (versus RHE) on Cu<sub>2</sub>(OH)<sub>2</sub>CO<sub>3</sub> and Cu(OH)<sub>2</sub>, **c**, UV-Vis spectra of the electrolyte of Cu<sub>2</sub>(OH)<sub>2</sub>CO<sub>3</sub> after charging at different potentials for 1 h with CO<sub>2</sub> by using indophenol blue method, and **d**, UV-vis spectra of NH<sub>4</sub><sup>+</sup> with or without urea decomposition for Cu<sub>2</sub>(OH)<sub>2</sub>CO<sub>3</sub> at applied potential of -0.9 V (versus RHE). The above UV-Vis curves were measured by the chromogenic solutions after 20 times dilution.

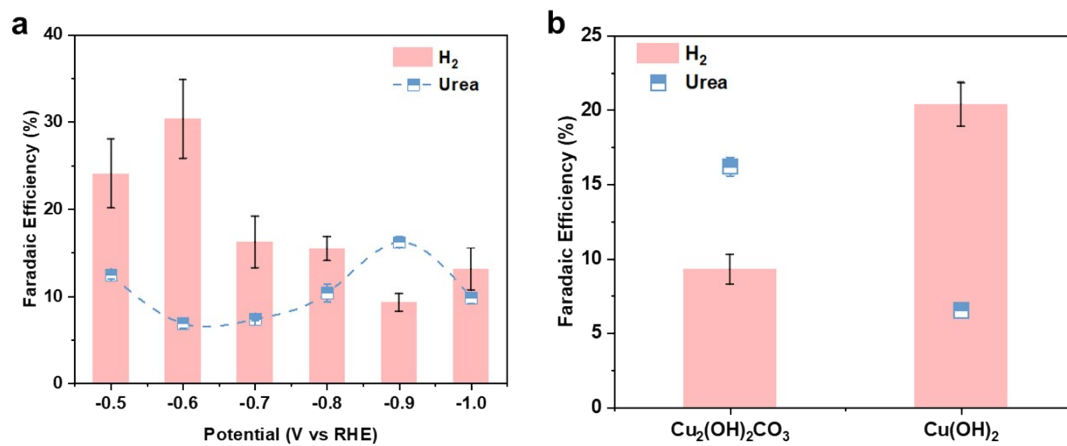

**Supplementary Figure 13.** Relationship of Faradaic Efficiency between urea and H<sub>2</sub> with **a**, various potentials, and **b**, different catalysts.

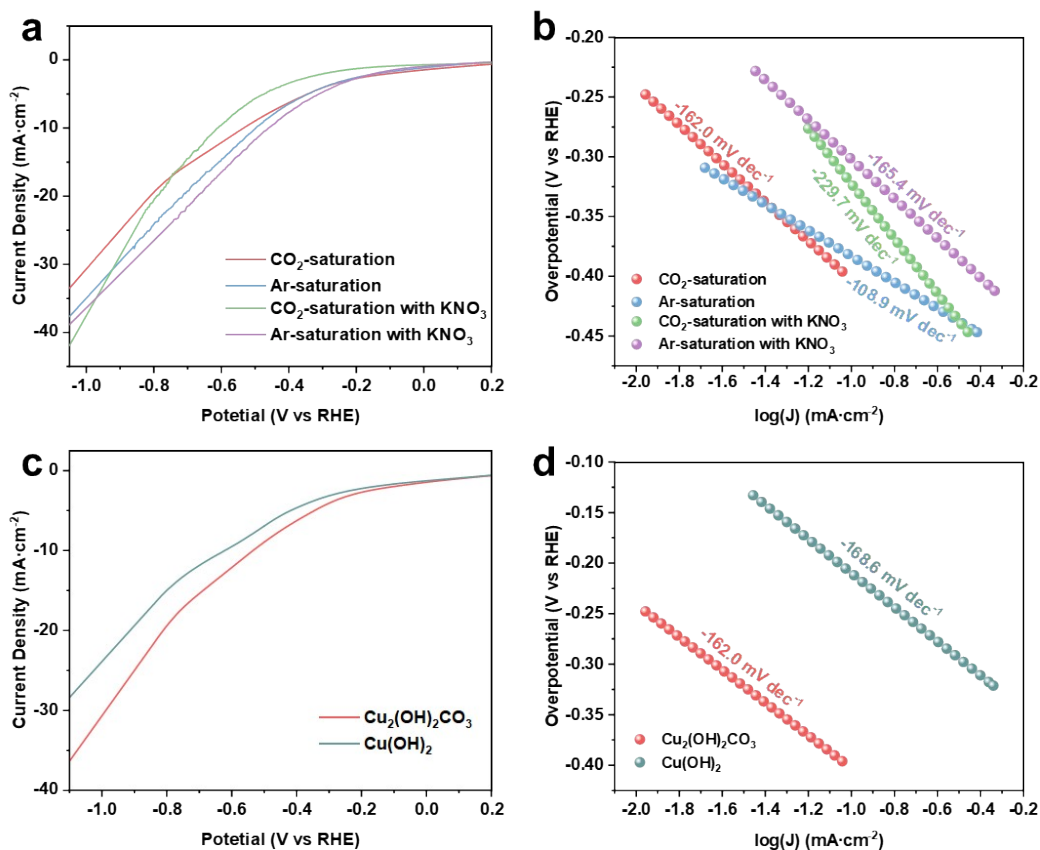

**Supplementary Figure 14.** **a**, LSV, and **b**, corresponding Tafel curves over  $\text{Cu}_2(\text{OH})_2\text{CO}_3$  with different conditions, **c**, LSV, and **d**, corresponding Tafel curves over  $\text{Cu}_2(\text{OH})_2\text{CO}_3$  and  $\text{Cu}(\text{OH})_2$  with  $\text{CO}_2$ -saturation  $0.1\text{ M KHCO}_3+0.05\text{ M KNO}_3$ .

The Tafel slope is used to express the relationship between the overpotential and the logarithm of the current density, which is used to characterize the reaction rate and is closely related to the intrinsic properties of the electrocatalyst.<sup>8, 9</sup> As shown in Supplementary Figure 14a,b, when saturated with Ar, and the current density obtained at the same potential is smaller, the hydrogen evolution reaction is more intense. For  $\text{CO}_2$  saturated with different electrolytes, the Tafel slope was greater for  $0.1\text{ M KHCO}_3 + 0.05\text{ M KNO}_3$  compared to  $0.15\text{ M KNO}_3$  alone, indicating that the presence of the  $\text{KHCO}_3$  may suppress the hydrogen evolution reaction to some extent.

When comparing the LSV and Tafel curves of the two catalysts at CO<sub>2</sub>-saturation with 0.1 M KHCO<sub>3</sub> + 0.05 M KNO<sub>3</sub>, the Cu<sub>2</sub>(OH)<sub>2</sub>CO<sub>3</sub> has a smaller Tafel slope than Cu(OH)<sub>2</sub>, indicating that the smaller overpotential required to provide the same increment of current density, and the faster the electron transport rate (Supplementary Figure 14c, d). High-performance electrocatalysts should have smaller Tafel slope values.

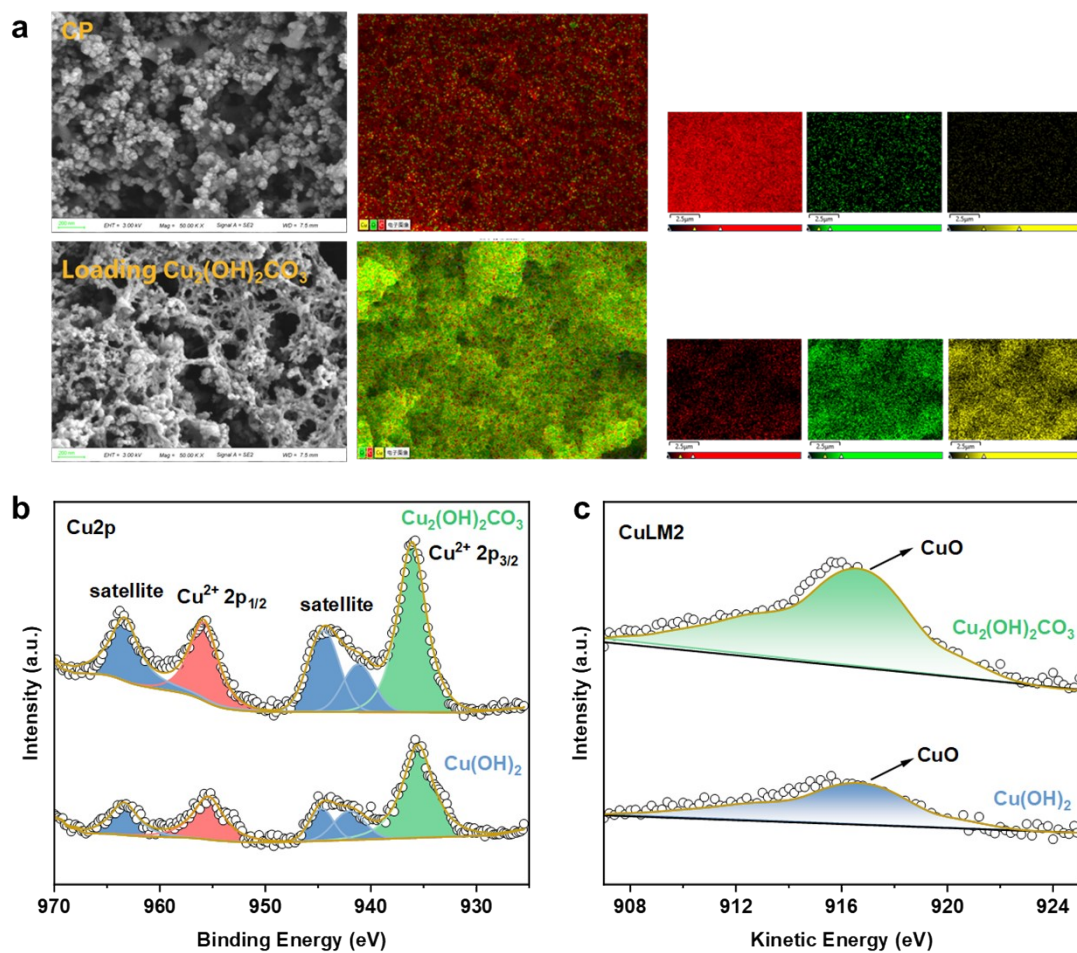

**Supplementary Figure 15.** **a**, SEM and corresponding EDS images of before and after electrode loaded  $\text{Cu}_2(\text{OH})_2\text{CO}_3$ , and **b**, High resolution Cu 2p, and **c**, corresponding CuLM2 spectrums of electrodes loaded with  $\text{Cu}_2(\text{OH})_2\text{CO}_3$  and  $\text{Cu}(\text{OH})_2$ .

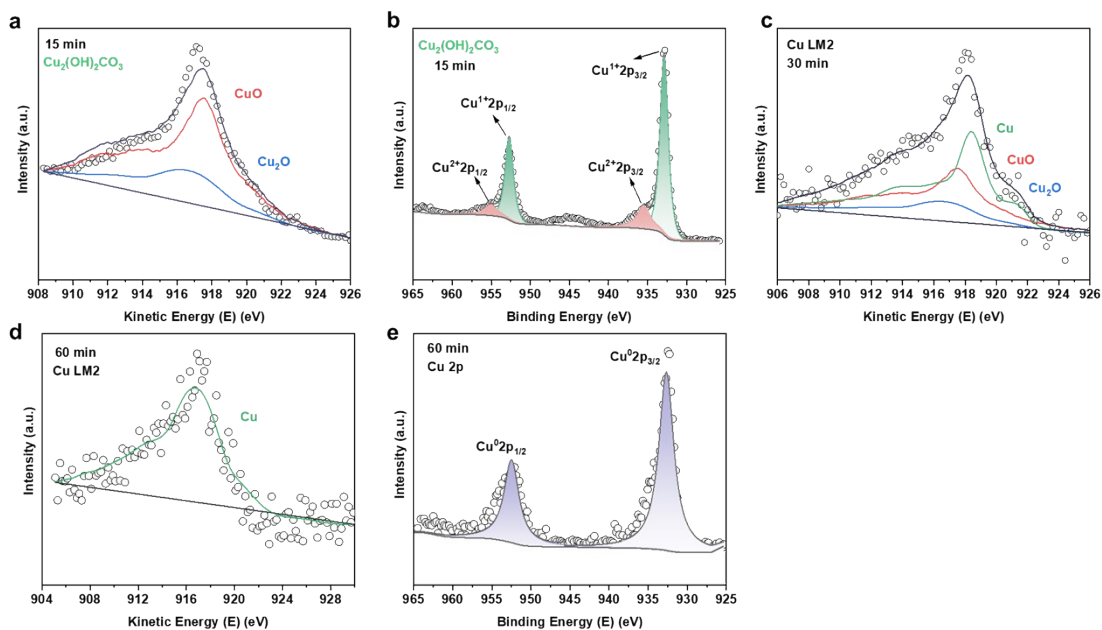

**Supplementary Figure 16. a**, Cu LM2, and **b**, Cu 2p spectrums of the electrode at 15 min of reaction, **c**, **d**, Cu LM2 spectrums of the electrode at 30 min of reaction. Cu LM2, and **e**, Cu 2p spectrums of the electrode at 60 min of reaction. The electrode is loaded with Cu<sub>2</sub>(OH)<sub>2</sub>CO<sub>3</sub>.

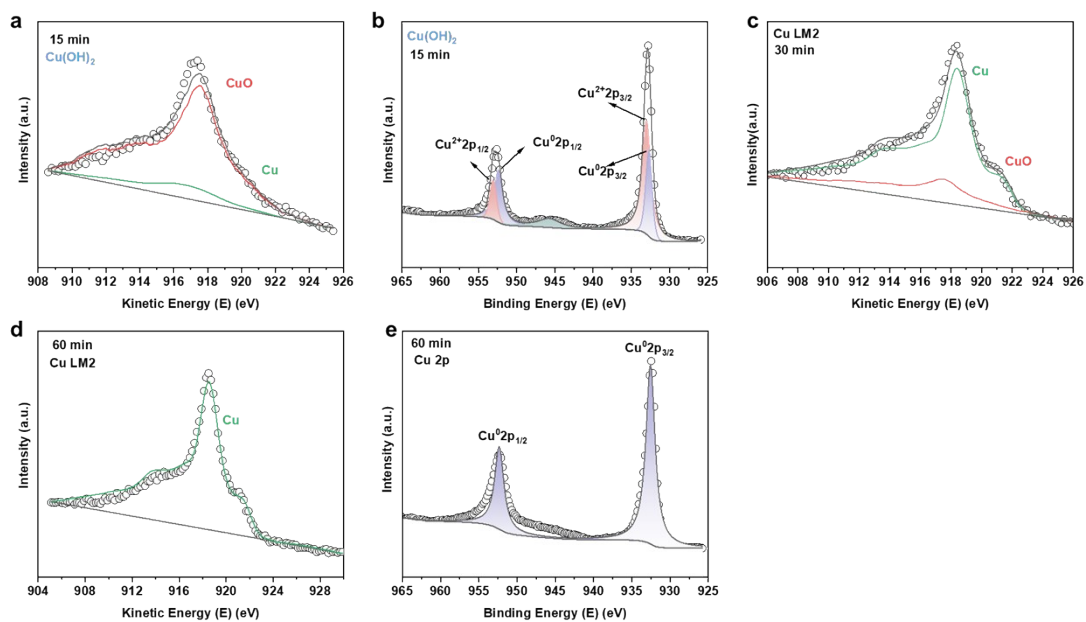

**Supplementary Figure 17.** **a**, Cu LM2, and **b**, Cu 2p spectrums of the electrode at 15 min of reaction, **c**, **d**, Cu LM2 spectrums of the electrode at 30 min of reaction. Cu LM2, and **e**, Cu 2p spectrums of the electrode at 60 min of reaction. The electrode is loaded with Cu(OH)<sub>2</sub>.

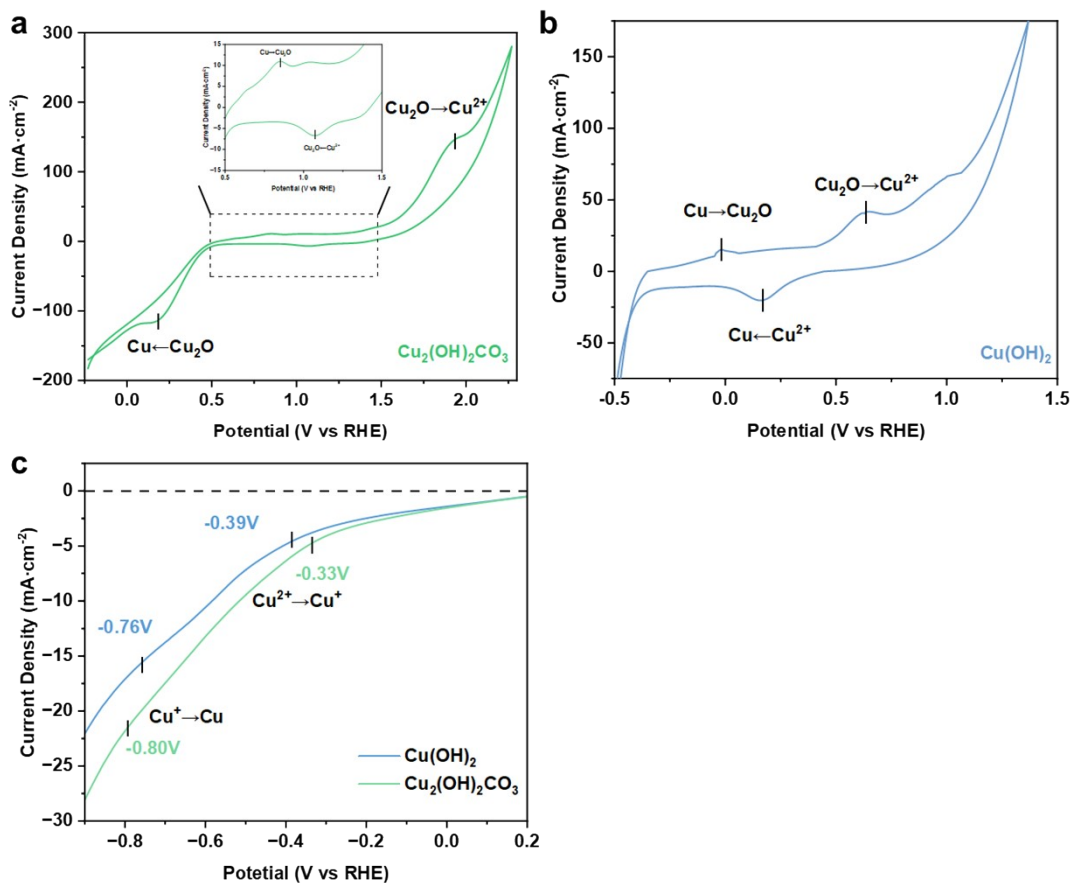

**Supplementary Figure 18.** Cyclic Voltammetry of **a**,  $\text{Cu}_2(\text{OH})_2\text{CO}_3$ , **b**,  $\text{Cu}(\text{OH})_2$  in 0.1 M KOH, and **c**, Linear Sweep Voltammetry (LSV) with these two catalysts in Ar-saturated 0.1 M  $\text{KHCO}_3 + 0.05$  M  $\text{KNO}_3$ . Potential sweep rate was  $5 \text{ mV s}^{-1}$ .

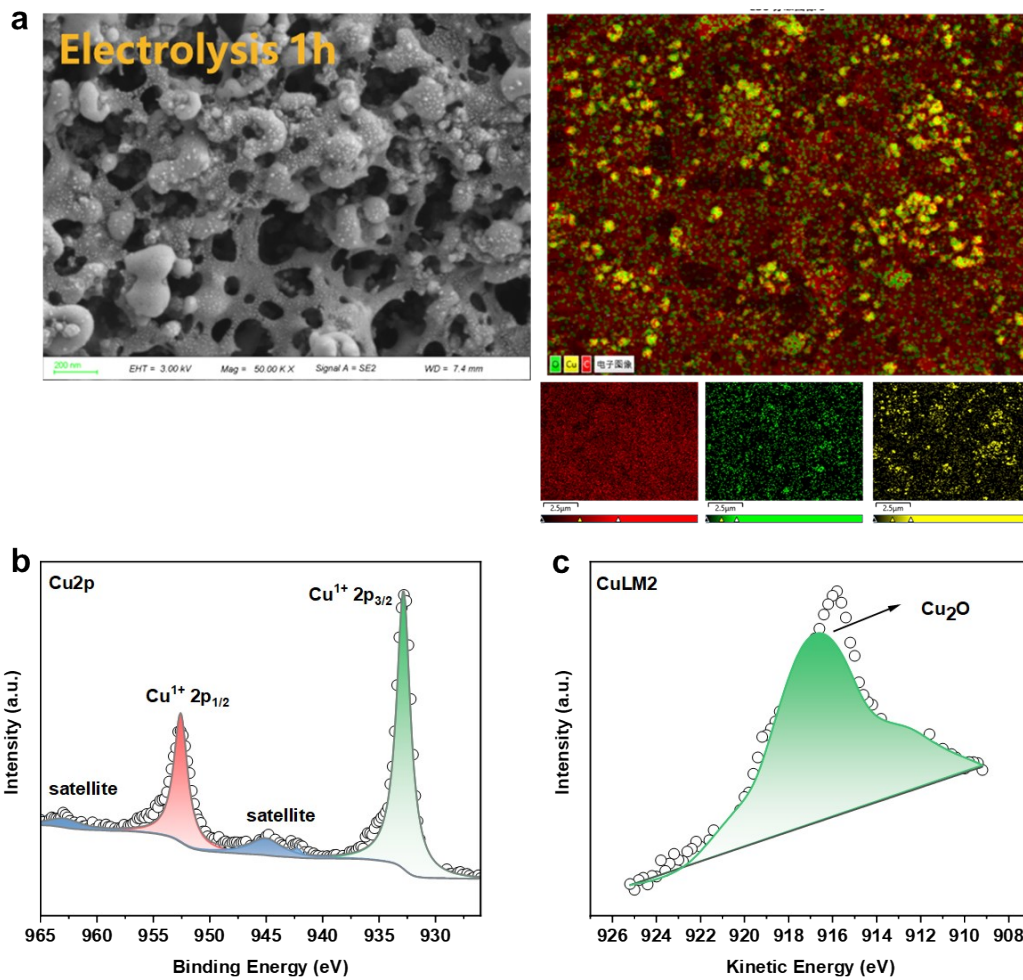

**Supplementary Figure 19.** **a**, SEM and corresponding EDS images, **b**, High resolution Cu 2p, and **c**, corresponding CuLM2 spectrums of loaded  $\text{Cu}_2(\text{OH})_2\text{CO}_3$  electrode after 1h of electrolysis.

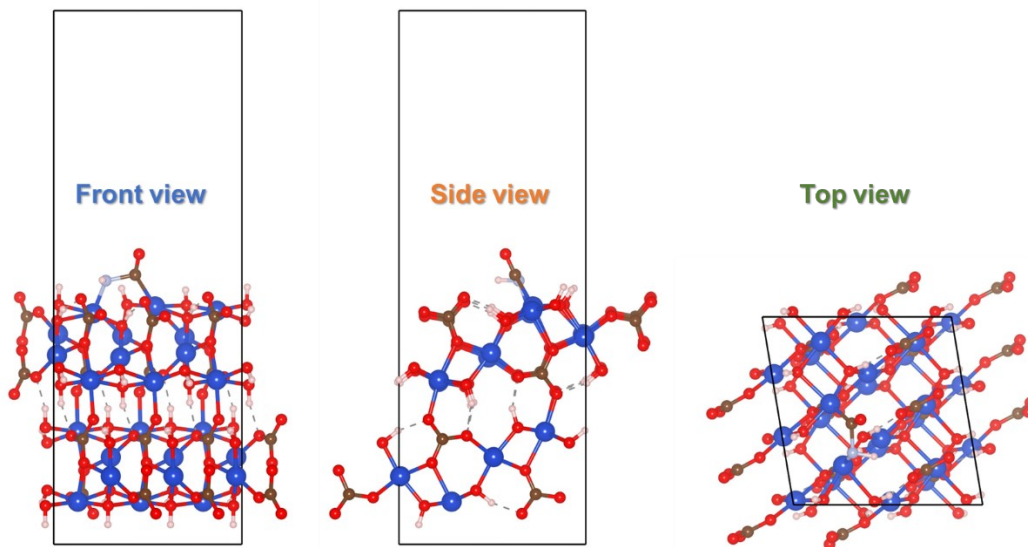

**Supplementary Figure 20.** The construction of  $\text{Cu}_2(\text{OH})_2\text{CO}_3$  (010) surface with different viewing angles. Red, blue, brown and pink balls represent O, Cu, C and H, respectively.

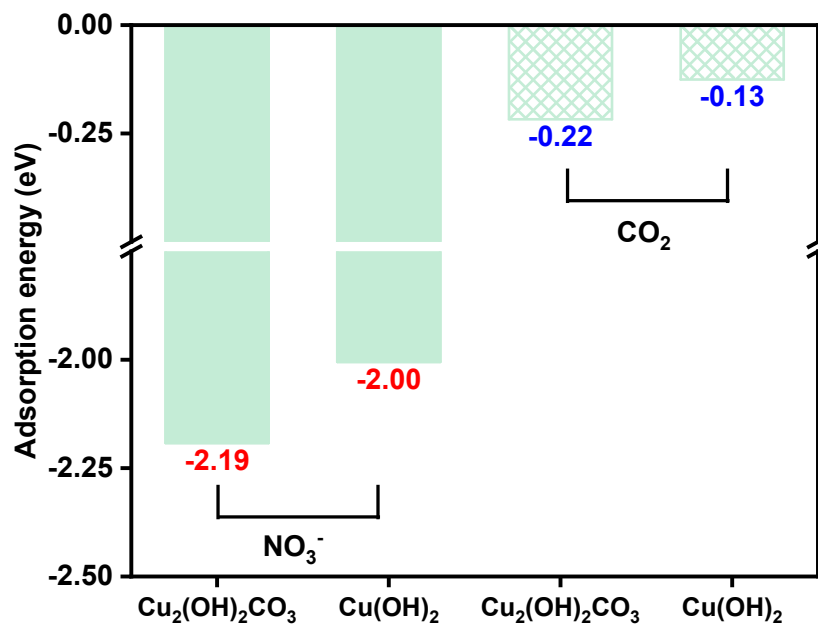

**Supplementary Figure 21.** Adsorption energy of  $\text{NO}_3^-$  and  $\text{CO}_2$  on  $\text{Cu}_2(\text{OH})_2\text{CO}_3$  electrocatalysts.

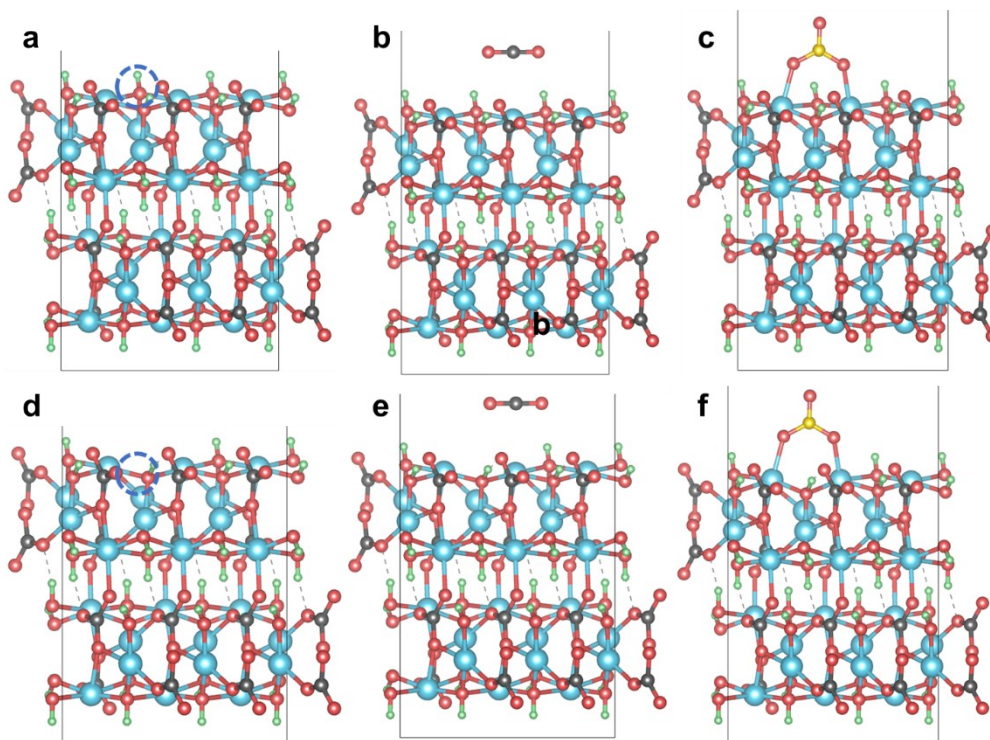

Supplementary Figure 22. Optimized adsorption configurations of  $\text{CO}_2$  and  $\text{NO}_3^-$  on pristine and oxygen-vacancy-containing  $\text{Cu}_2(\text{OH})_2\text{CO}_3$  surfaces. a, Pristine  $\text{Cu}_2(\text{OH})_2\text{CO}_3$  surface. b,  $\text{CO}_2$  and c,  $\text{NO}_3^-$  adsorption on pristine  $\text{Cu}_2(\text{OH})_2\text{CO}_3$ . d, Oxygen-vacancy-containing  $\text{Cu}_2(\text{OH})_2\text{CO}_3$  surface, where the surface oxygen vacancy is highlighted by the dashed blue circle. e,  $\text{CO}_2$  and f,  $\text{NO}_3^-$  adsorption on the oxygen-vacancy-containing  $\text{Cu}_2(\text{OH})_2\text{CO}_3$  surface.

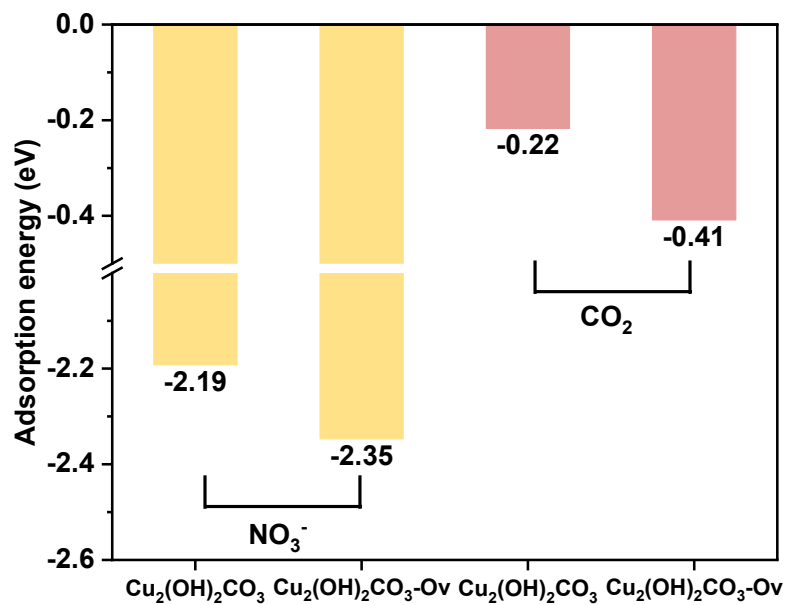

Supplementary Figure 23. Adsorption energy of NO<sub>3</sub><sup>-</sup> and CO<sub>2</sub> on Cu<sub>2</sub>(OH)<sub>2</sub>CO<sub>3</sub> and oxygen-vacancy-containing Cu<sub>2</sub>(OH)<sub>2</sub>CO<sub>3</sub> electrocatalysts.

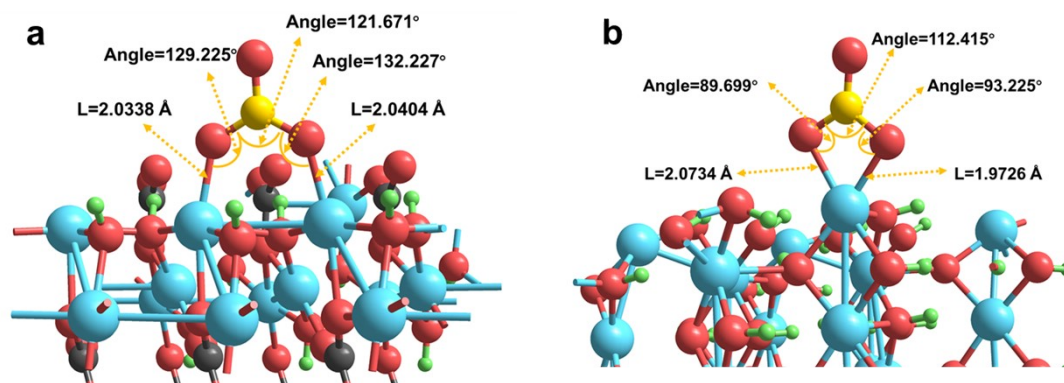

**Supplementary Figure 24.** Adsorption models of  $\text{NO}_3^-$  on **a**,  $\text{Cu}_2(\text{OH})_2\text{CO}_3$  and **b**,  $\text{Cu}(\text{OH})_2$  electrocatalysts. The bond length and bond angle changes when nitrate is adsorbed on different catalyst surfaces are shown in the figures.

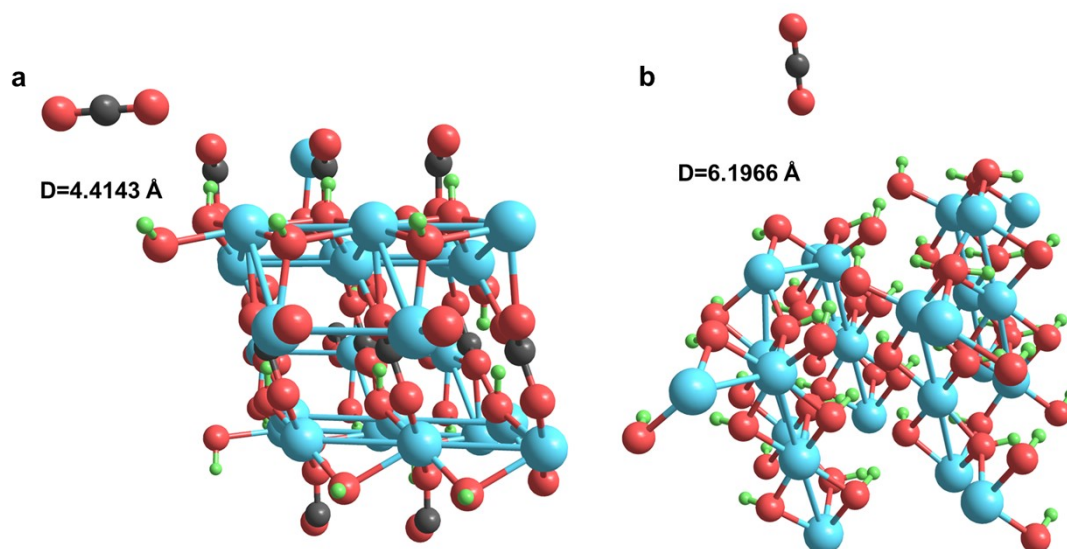

**Supplementary Figure 25.** Adsorption models of CO<sub>2</sub> on **a**, Cu<sub>2</sub>(OH)<sub>2</sub>CO<sub>3</sub> and **b**, Cu(OH)<sub>2</sub> electrocatalysts. The distance between the C atom in CO<sub>2</sub> and the Cu atom closest to the catalyst surfaces are shown in the figures.

**Supplementary Table 1.** Actual food waste anaerobic digestion effluent composition

| Components                             | Concentration |
|----------------------------------------|---------------|
| pH                                     | 8.20±0.04     |
| Total Solids (%)                       | 2.09±0.04     |
| Volatile Solids (%)                    | 1.38±0.02     |
| Proteins (mg/L)                        | 1918.17±37.50 |
| Chemical Oxygen Demand (mg/L)          | 63.57±0.96    |
| PO <sub>4</sub> <sup>3-</sup> (mg/L)   | 15.26±0.96    |
| NO <sub>3</sub> <sup>-</sup> -N (mg/L) | 269.54±2.71   |
| NO <sub>2</sub> <sup>-</sup> -N (mg/L) | 5.10±0.05     |
| NH <sub>4</sub> <sup>+</sup> -N (mg/L) | 3558.36±50.74 |

The anaerobic digestion effluent was obtained after 30 days of anaerobic digestion of food waste collected from a university canteen. Its main components are shown in **Supplementary Table 1**. Where total solids (TS) is the total amount of all solids (dissolved and suspended solids) in the liquid. And the volatile solids (VS) refers to the portion of solids that is volatilized/burned off under high temperature scorching, which usually represents the organic content. The anaerobic digestion effluent was filtered through a 0.22 µm membrane to remove solid impurities before the electrocatalytic reaction. Due to the high nutrient content of food waste, the post-digestion effluent contained elevated concentrations of soluble proteins and PO<sub>4</sub><sup>3-</sup> arising from protein hydrolysis. As for Chemical Oxygen Demand (COD), it's the amount of oxygen consumed by all organic and some inorganic substances that can be oxidized in the liquid under strong oxidant and acidic conditions, reflecting the overall oxidizable load. It is worth noting that digestion effluent contains significant amounts of NH<sub>4</sub><sup>+</sup>-N, low concentrations of NO<sub>3</sub><sup>-</sup>-N, and virtually nonexistent NO<sub>2</sub><sup>-</sup>-N, and these different forms of nitrogen provide a potential source for electrocatalytic C–N coupling for urea production.

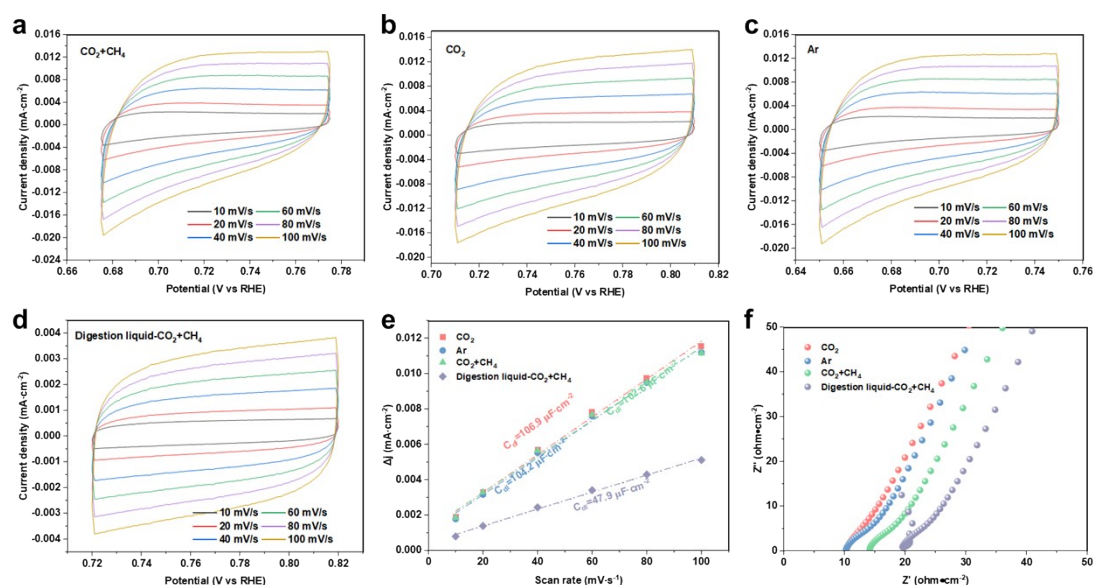

**Supplementary Figure 26.** The electrochemical active surface area measurements under different conditions. Cyclic voltammogram curves of **a**, 30% CO<sub>2</sub>+70% CH<sub>4</sub>-, **b**, CO<sub>2</sub>-, **c**, Ar-saturated 0.2M NH<sub>4</sub>HCO<sub>3</sub>+0.005M KNO<sub>3</sub>, and **d**, 30% CO<sub>2</sub>+70% CH<sub>4</sub>-saturated real digestion effluent. **e**, Cdl, and **f**, Nyquist curves of corresponding conditions.

As shown in **Supplementary Figure 26**, In the simulated food waste anaerobic digestion effluent, the ECSA and resistance of the electrodes did not differ much when saturated with different gases. In contrast, when using the actual anaerobic digestion effluent, the ECSA of the electrode decreases significantly and the solution internal resistance and electrode resistance increase.

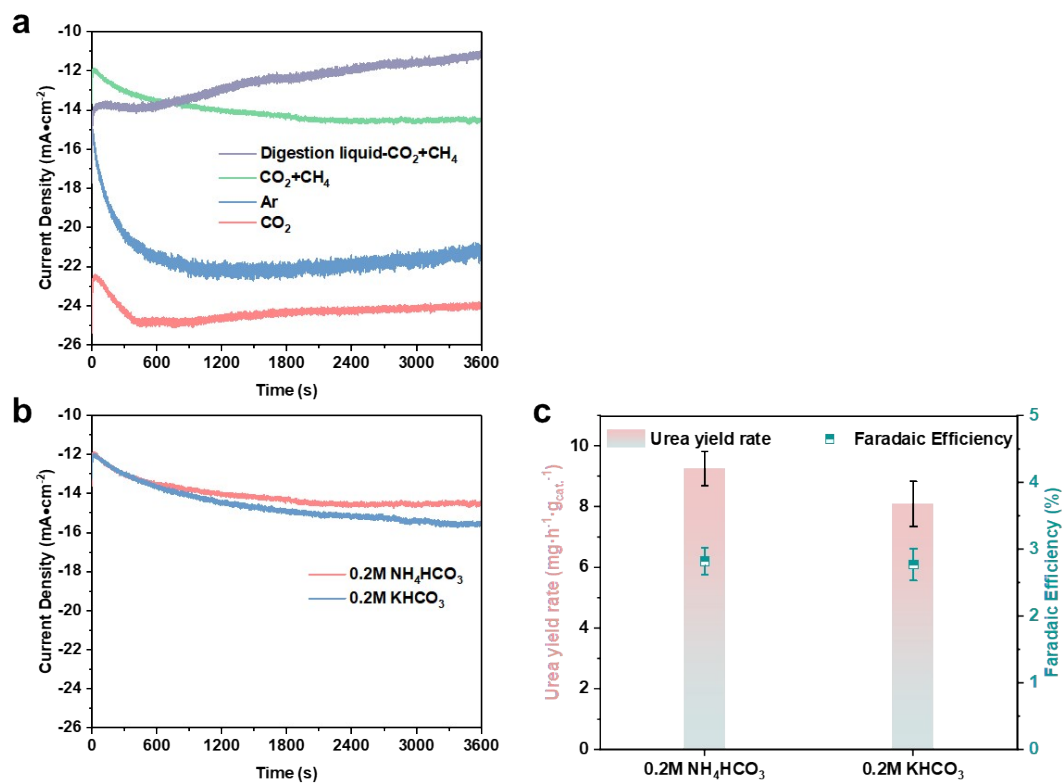

**Supplementary Figure 27.** I-t curves of different **a**, conditions and **b**, coexisting electrolyte at  $-0.9\text{V}$  vs RHE. **c**, Yield rate of urea and corresponding FE with different electrolyte at  $-0.9\text{V}$  vs RHE.

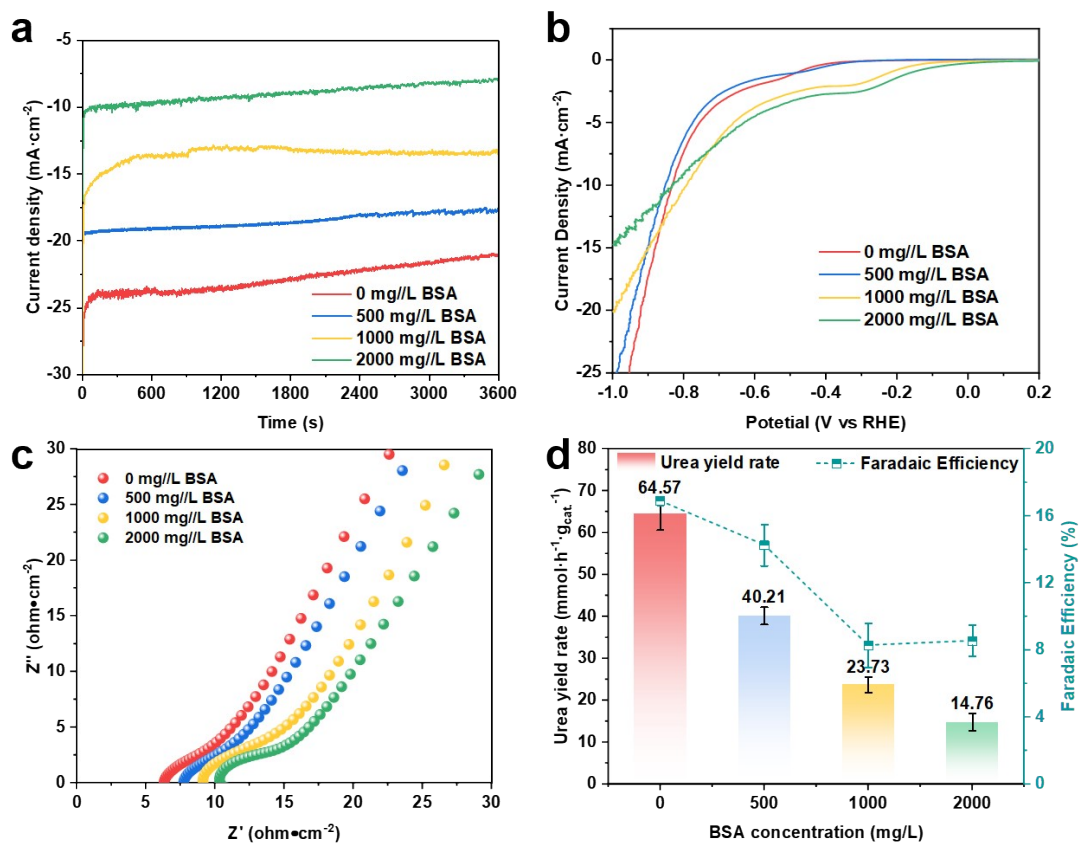

Supplementary Figure 28. Effect of BSA concentration on electrocatalytic urea synthesis over  $\text{Cu}_2(\text{OH})_2\text{CO}_3$ . a, I-t curves, b, LSV curves, c, Nyquist plots and d, Urea yield rate and Faradaic efficiency under different BSA concentrations.

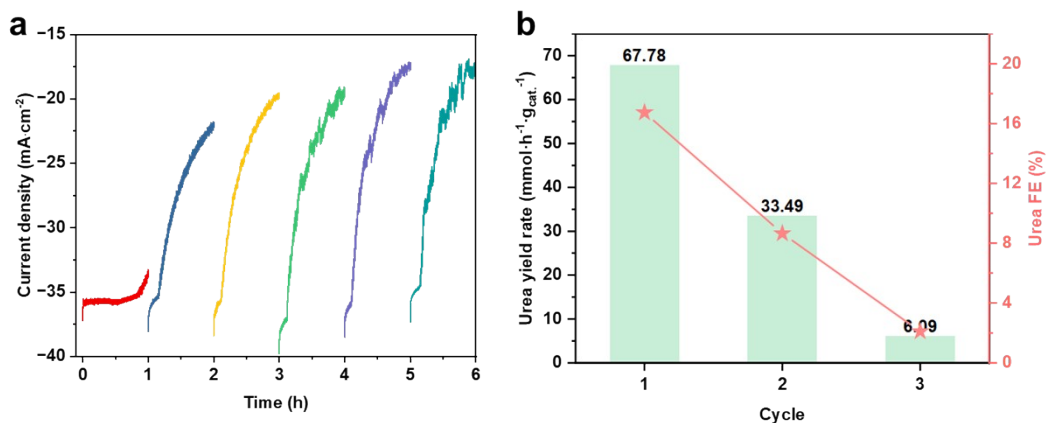

Supplementary Figure 29. a, I-t curves of  $\text{Cu}_2(\text{OH})_2\text{CO}_3$  during 5 h electrocatalytic urea synthesis at  $-0.9$  V versus RHE in  $\text{CO}_2$ -saturated  $0.1$  M  $\text{KHCO}_3$  +  $0.05$  M  $\text{KNO}_3$ . b, Changes in urea yield rate and selectivity during the first 3 cycles of  $\text{Cu}_2(\text{OH})_2\text{CO}_3$  electrocatalysis.

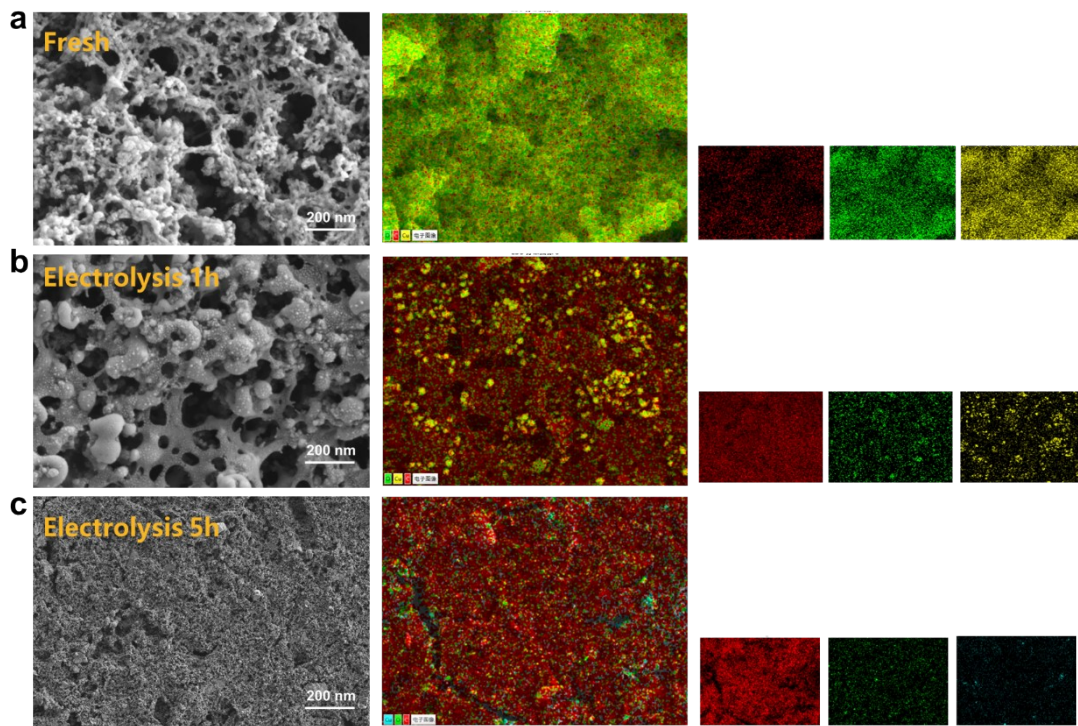

Supplementary Figure 30. SEM images and corresponding EDS elemental mappings of  $\text{Cu}_2(\text{OH})_2\text{CO}_3$  a, electrodes before electrolysis, b, after 1 h electrolysis, and c, after 5 h electrolysis.

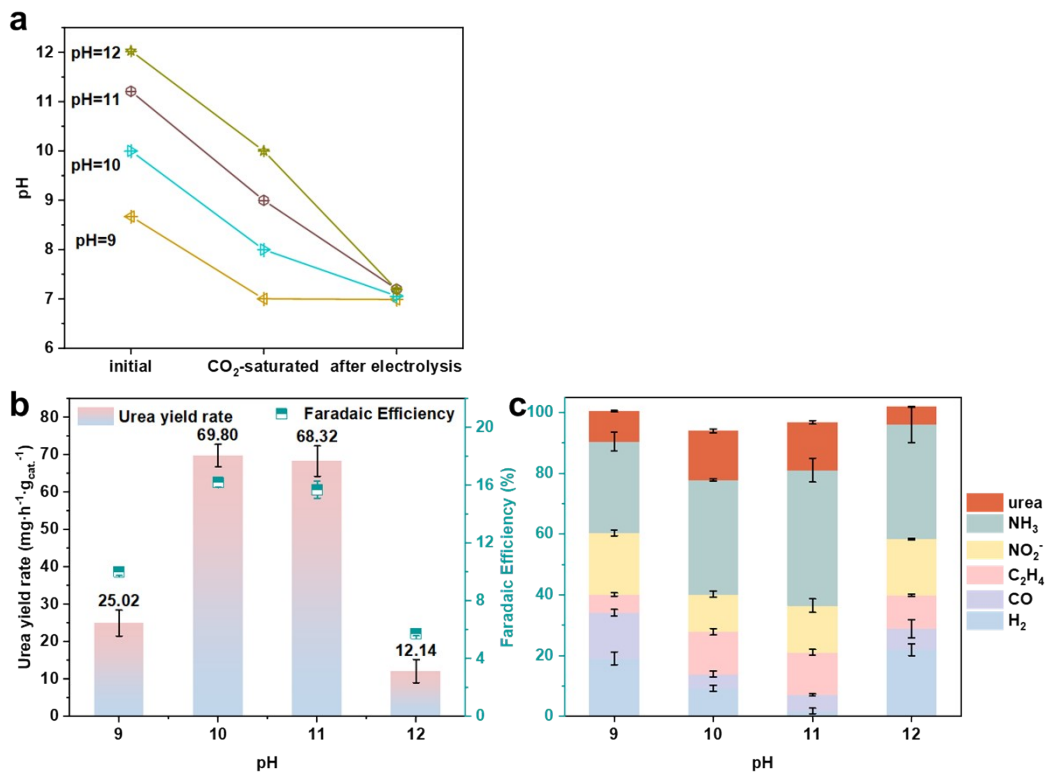

Supplementary Figure 31. a, pH evolution of electrolytes with different initial pH values after CO<sub>2</sub> saturation for 30 min and after 1 h electrolysis. b, Urea yield rate and Faradaic efficiency and c, Product distribution of Cu<sub>2</sub>(OH)<sub>2</sub>CO<sub>3</sub> at different initial electrolyte pH values at -0.9 V versus RHE. The electrolyte consists of 0.1 M KHCO<sub>3</sub> and 0.05 M KNO<sub>3</sub> and the pH is adjusted with 2 M KOH.

## Supplementary References

1. G. Kresse and J. Furthmüller, *Phys Rev B Condens Matter*, 1996, 54, 11169-11186.
2. G. Kresse and D. Joubert, *Physical Review B*, 1999, 59, 1758-1775.
3. J. P. Perdew, K. Burke and M. Ernzerhof, *Physical Review Letters*, 1996, 77, 3865-3868.
4. S. Grimme, J. Antony, S. Ehrlich and H. Krieg, *The Journal of Chemical Physics*, 2010, 132.
5. H. J. Monkhorst and J. D. Pack, *Physical Review B*, 1976, 13, 5188-5192.
6. C. Wei, S. Sun, D. Mandler, X. Wang, S. Z. Qiao and Z. J. Xu, *Chemical Society Reviews*, 2019, 48, 2518-2534.
7. K. A. Stoerzinger, M. Risch, B. Han and Y. Shao-Horn, *ACS Catalysis*, 2015, 5, 6021-6031.
8. H. Xiao, T. Cheng and W. A. Goddard, III, *Journal of the American Chemical Society*, 2017, 139, 130-136.
9. A. M. Limaye, J. S. Zeng, A. P. Willard and K. Manthiram, *Nature Communications*, 2021, 12, 703.
